1 **Proanthocyanidin-enriched cranberry extract induces resilient bacterial community dynamics**  
2 **in a gnotobiotic mouse model**

3  
4 Catherine C. Neto<sup>1,2,\*,\*\*</sup>, Benedikt M. Mortzfeld<sup>3,\*</sup>, John R. Turbitt<sup>1,2</sup>, Shakti K. Bhattarai<sup>3</sup>, Vladimir  
5 Yeliseyev<sup>4</sup>, Nicholas DiBenedetto<sup>4</sup>, Lynn Bry<sup>4</sup>, Vanni Bucci<sup>2,3,\*\*</sup>

6 <sup>1</sup>Department of Chemistry and Biochemistry University of Massachusetts-Dartmouth, North  
7 Dartmouth, MA

8 <sup>2</sup>UMass Cranberry Health Research Center, University of Massachusetts-Dartmouth, North  
9 Dartmouth, MA

10 <sup>3</sup>Department of Microbiology and Physiological Systems, University of Massachusetts Medical  
11 School, Worcester, MA

12 <sup>4</sup>Massachusetts Host-Microbiome Center, Department of Pathology, Brigham and Women's  
13 Hospital, Harvard Medical School, Boston MA

14 \*equally contributing authors

15 \*\*co-corresponding authors

16

17 Correspondence should be addressed to:

18 Vanni Bucci, PhD

19 [vanni.bucci2@umassmed.edu](mailto:vanni.bucci2@umassmed.edu) or [cneto@umassd.edu](mailto:cneto@umassd.edu)

20 368 Plantation St

21 Worcester, MA 01605

22 Phone: 774-455-3854

23

24 **Running title:** Cranberry juice extract microbiome dynamics

25

26 **Keywords:** Cranberry extract, Polyphenols, Proanthocyanidins, Microbiome dynamics,  
27 Gnotobiotic mouse model, Microbiome resilience, Akkermansia muciniphila

## 28 **Abstract**

29 Cranberry consumption has numerous health benefits, with experimental reports showing its  
30 anti-inflammatory and anti-tumor properties. Importantly, microbiome research has  
31 demonstrated that the gastrointestinal bacterial community modulates host immunity, raising  
32 the question whether the cranberry-derived effect may be related to its ability to modulate the  
33 microbiome. Only a few studies have investigated the effect of cranberry products on the  
34 microbiome to date. Especially because cranberry is rich in dietary fibers, we do not know the  
35 extent of microbiome modulation that is caused solely by polyphenols, particularly  
36 proanthocyanidins (PACs). Since previous work has only focused on the long-term effects of  
37 cranberry extracts, in this study we investigated the effect of a water-soluble, polyphenol-rich  
38 cranberry juice extract (CJE) on the short-term dynamics of human-derived bacterial community  
39 in a gnotobiotic mouse model. CJE characterization revealed a high enrichment in PACs (57%  
40 PACs), the highest ever utilized in a microbiome study. In a 37-day experiment with a 10-day CJE  
41 intervention and 14-day recovery time, we profiled the microbiota via 16 rDNA sequencing and  
42 applied diverse time-series analytics methods to identify individual bacterial responses. We show  
43 that daily administration of CJE induces distinct dynamical patterns in bacterial abundances  
44 during and after treatment before recovering resiliently to pre-treatment levels. Specifically, we  
45 observed an increase of the immunomodulatory mucin degrading *Akkermansia muciniphila* after  
46 treatment, suggesting intestinal mucus accumulation due to CJE. Interestingly, this expansion  
47 coincided with an increase in the abundance of butyrate-producing Clostridia, a group of  
48 microbes known to promote numerous adaptive and innate anti-inflammatory phenotypes.

49

## 50 **Introduction**

51 Cranberry (*Vaccinium macrocarpon*) is a botanical product used worldwide for the maintenance  
52 of a healthy urinary tract. It is consumed in the form of fruit, juice, and other products as part of  
53 a diet rich in fibers and polyphenols for the prevention of urinary conditions and diseases of aging  
54 including cardiovascular diseases and cancers [1]. Cranberry proanthocyanidins (PACs) and other  
55 constituents interact with a wide variety of bacteria including gut microbes that cause UTIs and  
56 other health conditions, by reducing adhesion, biofilm, co-aggregation [2]. Persistent gut  
57 inflammation as experienced in ulcerative colitis, inflammatory bowel disease (IBD) or Crohn's  
58 disease have been linked to genetic factors, lifestyle and dietary habits [3], increasing the risk for  
59 colon cancer [4].

60 Consuming foods high in anti-inflammatory and antioxidant compounds such as polyphenols or  
61 dietary fiber may therefore provide a preventative strategy to mitigate these conditions and  
62 reduce colon cancer risk. Previous studies by us, using a DSS-AOM mouse model of colitis-induced  
63 colon tumorigenesis, showed a significant reduction in colon tumors and tissue inflammation in  
64 mice fed either whole cranberry powder[5] or cranberry extracts rich in either polyphenol or non-

65 polyphenol constituents of cranberry[6]. Multiple compounds in cranberries including flavonoids,  
66 PACs and triterpenoids have also been reported to reduce tumor cell growth and proliferation,  
67 stimulate apoptosis, induce cell cycle arrest and alter associated signaling processes in cells [7–  
68 10].

69 A significant amount of work has recently demonstrated the role of the gastrointestinal  
70 microbiota in modulating host immunity[11]. Seminal studies in animal models have  
71 demonstrated that short-chain fatty acids, and in particular butyrate-producing Clostridia Cluster  
72 IV and XIVa promote the induction of regulatory T-cells and ameliorate symptoms of colitis [12].  
73 Furthermore, these bacteria have been associated with dampening systemic inflammatory  
74 response in humans [13] and with promotion of neurological health and of related anti-  
75 inflammatory innate immune phenotypes [14]. Recent work has also shown that specific  
76 members of the *Bacteroides*, *Parabacteroides* and *Fusobacterium* genera robustly induce  
77 interferon- $\gamma$ -producing CD8 T cells in the intestine and enhance therapeutic efficacy of immune  
78 checkpoint inhibitors in syngeneic tumor models [15]. Similarly, a recent clinical study  
79 demonstrated that patients lacking *Akkermansia muciniphila* did not respond to PD-1 checkpoint  
80 inhibitor immunotherapy ([16]. Remarkably oral administration of *A. muciniphila* was capable of  
81 restoring the efficacy of PD-1 blockade *in vivo* [16], thus demonstrating the causality of the  
82 phenotype and highlighting the importance of this bacterium in modulating anti-cancer  
83 immunity.

84 Due to the role that the microbiome has on immune modulation, significant interest is currently  
85 placed on understanding the effect of dietary interventions on this system [17] and how diet can  
86 be tailored to impact the microbiome and promote health [18, 19]. Thanks to this work it is now  
87 established that dietary fibers from plants can promote a healthy and anti-inflammatory  
88 microbiome while enrichment in animal diet has been shown to select for bacteria that have  
89 been associated with immune dysregulation and pathogenesis [20].

90 Interestingly, a few studies have investigated the effect of cranberry extracts on the microbiome  
91 and shown that members of the genus *Akkermansia*, as well as members of the *Bifidobacteria*  
92 and *Clostridia* order appear to be positively affected by long-term interventions with Cranberry  
93 derivatives [21–23]. which is also associated with the amelioration of symptoms in a Dextran  
94 Sulfate Sodium (DSS)-induced gut inflammation mouse model [24]. However, because cranberry  
95 fruit averages about 36% fiber on a dry weight basis [25], we do not know the extent of  
96 microbiome modulation that is due to the sole polyphenols. Additionally, it is not known how  
97 quickly the microbiome responds to a challenge with polyphenol-rich cranberry extracts, since  
98 previous studies only focused on long-term effects. A clearer answer to these questions will  
99 provide us with a greater understanding of the role of cranberry polyphenols in modulating gut  
100 microbiota dynamics and how cranberry polyphenol-based dietary interventions could be used  
101 to promote gut health in the future.

## 102 Results

103 **Cranberry product composition.** A water-soluble, polyphenol-rich cranberry juice extract (CJE)  
104 was chosen for this study, allowing for safe administration via oral gavage to gnotobiotic mice.  
105 The major polyphenols in cranberries are poly-flavan-3-ol oligomers, or PACs composed primarily  
106 of epicatechin units with two types of linkages, either direct carbon-carbon bonding (B-type) or  
107 carbon-carbon bonding with an additional ether linkage between units (A-type). Cranberry fruit  
108 ranges widely in soluble PAC content depending on cultivar and other factors [26]. PACs are  
109 widely distributed in foods and plant sources, and most contain only B-type linkages. The  
110 presence of A-type linkages is characteristic of PACs found in cranberries and other *Vaccinium*  
111 fruits [27]. PACs have long been associated with the urinary health benefits of cranberry, and  
112 cranberry juice and extracts have been the subject of multiple clinical trials and other studies,  
113 reviewed in [2]. Constituents detected in utilized CJE are summarized in **Figure 1A**. The total PAC  
114 content in the utilized CJE was determined to be  $574 \pm 40$  mg/g (57.4%) using the DMAC method  
115 with an authentic cranberry PAC standard. Consistent with previous studies (Patel, 2011)[28],  
116 PAC oligomers of up to eight degrees of polymerization with at least one A-type linkage were  
117 detected in the 70% acetone-soluble PAC fraction of CJE by MALDI-TOF MS (**Figure 1B,C**) Other  
118 polyphenols present in CJE detected by HPLC-DAD and MALDI-TOF MS analyses include flavonols,  
119 primarily quercetin glycosides[29] and anthocyanins, primarily cyanidin and peonidin glycosides  
120 (**Figure S1, Table S1**). The total flavonol content and total anthocyanin content of CJE were  $9.6 \pm$   
121  $0.5$  mg/g and  $3.4 \pm 0.3$  mg/g, respectively (**Figure 1A**).

122 Quantitative  $^1\text{H}$  NMR analysis found no detectable content of ursolic and oleanolic acids,  
123 triterpenoids, which are typically present in the peel of cranberry fruit and associated with the  
124 chemopreventive properties of cranberry[6, 7]. Whole cranberry fruit contains approximately 10  
125 mg/g dry weight, or 1% ursolic acid, but due to its low water-solubility, cranberry juice and  
126 products derived from juice are much lower in triterpenoid content [8]. No quinic, malic or citric  
127 acids were detected, suggesting that smaller organic acids characteristic of cranberry juice were  
128 removed by the commercial preparation process (**Figure 1A**).  $^1\text{H}$  NMR confirmed the presence of  
129 benzoic acid by comparison with an authentic standard, as well as a major derivative of benzoic  
130 acid, the glucoside 6-O-benzoyl-D-glucose, which was identified by comparison of aromatic  
131 proton signals between 7.4 – 8.1 ppm and the anomeric proton signal for glucose at 5.6 ppm with  
132 those previously reported (**Figure S2**) [30]. The remaining glucoside signals were obscured by  
133 other signals in the 3.5 – 5.5 ppm region associated with multiple flavonoid glycosides. Based on  
134 peak fit integration of aromatic protons for benzoic acid and its glucoside, the CJE contained 30.9  
135 mg 6-O-benzoyl-D-glucose and 17.6 mg benzoic acid per g dry weight. Thus, CJE contains nearly  
136 5% free and conjugated benzoic acid.  $^1\text{H}$  NMR also contained signals between 6.3 and 6.8 ppm  
137 characteristic of p-coumaric acid, a major hydroxycinnamic acid in cranberry, however it appears  
138 to be present in very low quantity in CJE.

139 Multiple ions were detected in the MALDI-TOF MS spectrum of CJE having masses consistent with  
140 previously published data for cranberry oligosaccharides (**Figure S3**). These included poly-  
141 galacturonic acid methyl esters of three and four galacturonic acid units (specifically  $[M+Na^+]$  at  
142 579 for  $uG3^{m2}$   $m/z = 556$ ; and  $[M+Na^+]$  at 769 for  $uG4^{m3}$   $m/z = 746$ ) as reported by Sun and  
143 coworkers [31] and a series of larger arabinoxyloglucan oligomers containing between 5 – 9  
144 hexose units and 4 – 8 pentose units. This pattern of oligomer masses is similar to those  
145 previously reported in cranberry-derived materials [32, 33], but includes larger oligomers, with  
146 molecular weights between 1680 and 2532 amu (**Table S2**). Thus, CJE apparently contains a  
147 variety of oligosaccharides. We were unable to quantify oligomer content in CJE due to lack of  
148 appropriate reference standards.

149  
150 **Gut microbiome resilience induced by CJE.** The current literature reports conflicting results on  
151 how cranberry-derived compounds affect the microbial gut community. Most of the microbiome  
152 modulatory effect has been attributed to high fiber contents of the fruit as well as their high  
153 abundance in polyphenols, however, thorough time-dependent *in vivo* analyses are missing to  
154 date, since all previous studies only report analyses through snapshots of selective timepoints  
155 [21, 22, 34, 35]. While whole cranberry fruit contains approximately 4% PACs on a dry weight  
156 basis [36, 37], other studies have utilized moderately enriched extracts (10 %) in order to  
157 investigate the long-term effect of PACs on the microbiome [34] We aimed to study the dynamic  
158 response of the gut microbiome to CJE highly enriched in PACs (57 %) over the course of the  
159 intervention as well as after the treatment. In order to closely monitor the complex microbial  
160 dynamics *in vivo* over several weeks, we chose to utilize a simplified human microbiome  
161 consisting of 25 predefined commensal bacteria. Six germ-free C57BL/6J mice were colonized by  
162 oral gavage and housed under gnotobiotic conditions. After two weeks of microbiome  
163 establishment the mice were given 200 mg/kg body weight (5 mg) of CJE daily for a period of 10  
164 days, followed by a recovery phase of two weeks (**Figure 2A**).

165 After first establishment of the gut microbiome at day 9 of the experiment, we found that 15 of  
166 the 25 species consistently colonized the mice's guts. Strikingly, the initial microbiome was  
167 dominated by *Bacteroides ovatus* with about 80 % total abundance, a prominent colonizer of the  
168 human gut microflora. When comparing the Bray Curtis distances of each time point to the pre-  
169 treatment on day 9, we found a bimodal dynamic over the course of the experiment (**Figure 2B**).  
170 Strikingly, after beginning the treatment with CJE on day 14 we saw a significant increase in the  
171 distance to the pre-treatment indicating major changes in the microbial gut composition.  
172 Interestingly, the microbiome recovers towards the end of the treatment around day 22 before  
173 offset of the CJE intervention induced another jump in distance at day 26. Thereafter the  
174 microbiome gradually stabilized resiliently, nearly returning to the pre-treatment level at day 37.  
175 In order to statistically evaluate the changes happening throughout the CJE experiment, we  
176 leveraged linear mixed effect (LME) modeling to compare the 3 intervals (pre, treatment, post)

177 of the experiment with one another. We found that CJE treatment itself affected species of the  
178 family Enterobacteriaceae, as *Escherichia* and *Klebsiella* species are able to significantly increase  
179 in abundance together with a gram-positive bacterium *Clostridium ramosum* whereas *Proteus*  
180 *mirabilis* decreases ( $p < 0.05$ , treatment vs. pre-treatment contrast from LME modeling; see also  
181 **Table 1**). As reflected by the distance plot in **Figure 2B**, a greater number of changes was  
182 observed when comparing abundances after treatment suspension (after day 23). Specifically,  
183 the main colonizer *Bacteroides ovatus* was found to significantly decrease in abundance,  
184 coinciding with an increase in *Clostridium hiranonis* and *Akkermansia muciniphila* ( $p < 0.05$  post-  
185 treatment vs treatment contrast from LME modeling; **Table 1, Figure 2**), making them the most  
186 abundant bacteria after *B. ovatus*. While *K. oxytoca* kept increasing in relative abundance even  
187 after the treatment, whereas *E. coli* and *P. mirabilis* returned to pre-treatment levels ( $p < 0.05$   
188 post-treatment vs treatment contrast from LME modeling). Overall, our data suggest that CJE  
189 treatment challenges the dominance of *B. ovatus* and promotes expansion of *A. muciniphila*, *C.*  
190 *hiranonis* and *K. oxytoca* ( $p < 0.05$  post-treatment vs pre-treatment contrast from LME modeling;  
191 **Table 1, Figure 2**) in a short time frame in this simplified microbial community.

192 The LME analysis relies on predefined intervals which are set *a priori* to reflect treatment  
193 boundaries. However, closer examination of the plots in **Figure 2** reveals that the majority of the  
194 observed bacterial dynamics may be shorter than the predefined windows. LME does not find *B.*  
195 *ovatus* to be responding in the during treatment window compared to pretreatment, because its  
196 mean relative abundance both drops and recovers throughout the 10 days of CJE intervention.

197 In order to unbiasedly define intervals of abundance change in the collected time-series, we  
198 applied a change point detection algorithm to the data set [38, 39]. Briefly this algorithm infers a  
199 position in the time series where the mean of the relative abundance changes across time  
200 intervals. For a given number of segments ( $K$ ),  $K-1$  change points are detected using the dynamic  
201 programming algorithm which minimizes the cost of segmentation along with reduced time  
202 complexity. To obtain an optimal number of segments ( $2 \leq K \leq K_{\max}$ ), an elbow curve is generated  
203 using cost of segmentation with respect to the number of segments. A knee point ( $K_{\text{opt}}$ ) with  
204 maximum curvature is estimated using the maximum of second derivative which is approximated  
205 using central difference (**Supplementary Figures S5B to Figure S16B**). Utilizing this approach, we  
206 estimated the intervals of change for every bacterium in every mouse (**Supplementary Figures**  
207 **S5 to Figure S16**) as well as for the mean abundance of each bacterium across multiple mice  
208 (**Figure 3**). Interestingly, this approach highlights variability across species in their response to  
209 CJE in terms of number of occurrences and locations of change points. Investigating the mean  
210 change point plots in **Figure 3**, it becomes apparent that three different dynamics can be  
211 observed throughout the treatment. Firstly, there was an early response just after the onset of  
212 the CJE treatment, followed by a quick partial to full recovery that, in the majority of cases, was  
213 still happening during the CJE intervention. This dynamic can be observed for *B. vulgatus*, *E. coli*,



214 *B. fragilis*, *C. ramosum* and *E. faecalis* (**Figure 3, Table 2**). Secondly, we could observe a late  
215 response after suspension of the CJE treatment followed by a recovery before the end of the  
216 experiment. This dynamic recorded for *A. muciniphila*, *C. hiranonis* and *L. reuteri* (**Figure 3, Table**  
217 **2**) may be fueled by the release of the selection pressure imposed by the CJE, allowing for a  
218 temporary rearrangement of the microbial community structure post treatment. Lastly, we could  
219 observe a set of bacteria that show an early or late response but never experience a recovery in  
220 relative abundance, including *B. ovatus*, *K. oxytoca*, *P. distasonis* and *P. mirabilis*. Interestingly,  
221 even though the change point algorithm does not detect a recovery for *B. ovatus* in the  
222 experimental time frame, the data for the individual mice reveal that a recovery event is detected  
223 for 4/6 mice before day 35 (**Table 2, Supplementary Figure S7**). Moreover, while the overall  
224 pattern looks similar across all mice, the individual responses vary in onset and duration, resulting  
225 in a diluted signal and therefore an incomplete recovery in the mean values (**Figure 3A**). Even  
226 though the overall resilient bacterial community structure returns back to pre-treatment levels  
227 at the end of the experiment (**Figure 2B**), especially the dynamics of the latter bacteria without  
228 a recovery demonstrate that an intervention with CJE is able to induce long-term changes in the  
229 gut microbiome. Overall, both the treatment with CJE as well as terminating the treatment  
230 challenge the dominance of the main colonizer *B. ovatus*, leading to the short-term expansion of  
231 other colonizers, including *Bacteroides* species, Clostridia and *Akkermansia*. However, in both  
232 instances *B. ovatus* showed signs of recovery within two weeks of change.

## 233 Discussion

234 Cranberry products are consumed around the world for their high nutritional values and  
235 antioxidants as well as to prevent urinary tract infections. While it is well established that  
236 cranberry derivatives, especially polyphenols, have a modulatory impact on the protective gut  
237 microbiome, the mechanisms by which bacteria influence inflammation-linked processes in gut  
238 tissues in the presence of cranberry phytochemicals and their various metabolites are not  
239 established. Other studies of cranberry's effect on gut microbiota in various mouse models have  
240 reported opposite responses of *Akkermansia muciniphila* in the gut population in response to  
241 treatment with cranberry, linking these effects to the polyphenols[34, 40]. However, polyphenol  
242 content and composition in cranberry-derived preparations varies widely depending on source  
243 materials and method of preparation, but PACs are typically the major constituent by weight[37].  
244 Anhe and coworkers fed C57BL/6J mice on a high-fat high-sucrose diet 200 mg per kg body weight  
245 of cranberry extract containing 10% PACs by weight for 8 weeks; the resulting reduction in insulin  
246 resistance and intestinal inflammation was associated with a significant increase in *A. muciniphila*  
247 ([34]. A related study of cranberry powder in a DSS-treated mouse model of gut inflammation  
248 found that the *A. muciniphila* population was boosted significantly by DSS treatment, an effect  
249 that could be partially reversed in mice fed cranberry powder for several weeks [40]. While all  
250 previous studies focused on long-term microbial effects reporting single time point after several  
251 weeks of treatment the short-term effects on the gut microbiome remained unknown. Therefore,  
252 we chose a 10-day intervention with a CJE rich in polyphenols (57% PACs) in order to monitor the  
253 immediate community dynamics through time and after suspension of the treatment. Using a  
254 gnotobiotic mouse model, we did not observe a significant increase of *A. muciniphila* during CJE  
255 treatment, however, the bacterium was able to flourish at the expense of the main colonizer *B.*  
256 *ovatus* after the treatment suggesting that it was affected by the PAC-rich CJE during the 10-day  
257 intervention.

258 Cranberry polyphenols have been reported to increase mucin secretion by goblet cells, which  
259 helps protect the gut mucous layer and barrier [41]. *Akkermansia* are mucin-degrading bacteria  
260 that liberate oligosaccharides from mucin and produce short chain fatty acids [42], which can  
261 then be utilized by butyrate-producing bacteria including commensal *Clostridia* (clusters XIVa and  
262 IV) and other *Firmicutes* [42]. Interestingly, the expansion of *A. muciniphila* coincides with the  
263 expansion of *Clostridium hiranonis* in our study (**Figure 3, Figure S5A Figure S9A**), a cluster XIVa  
264 bacterium, whereas *Clostridium ramosum* (Cluster XVIII) spiked during the treatment.  
265 Commensal *Clostridia* are strict gram-positive anaerobes that are thought to play important roles  
266 in modulating gut homeostasis, maintaining colonocyte health, participation in crosstalk  
267 between epithelial and immune cells, and can act as strong inducers of colonic T<sub>regs</sub> [43]. Low  
268 abundance of these *Clostridia* has been linked to inflammatory conditions such as IBD. However,  
269 the relationship between *A. muciniphila* and various inflammatory bowel diseases is not



270 completely clear, since overabundance of *Akkermansia* has been reported to exacerbate the  
271 inflammation caused by pathogenic bacteria *Salmonella typhimurium* [44, 45].

272 It is important to note that this and previous studies report relative bacterial abundances without  
273 information of actual biomass in the gastrointestinal tract. Therefore, it is possible that certain  
274 bacterial species grow in absolute abundance in response to the environmental change, while  
275 the main colonizer *B. ovatus* stays unaffected. Nevertheless, it is striking to observe that the  
276 mucin-degrading bacterium *A. muciniphila* appears to be kept in check during the CJE treatment  
277 even though it has been shown that PAC-related goblet cell density and mucus production in the  
278 ileum increase within a few days [41]. This suggests that *A. muciniphila* is susceptible to high  
279 concentrations of PACs but can expand in the community after the treatment by degrading the  
280 accumulated mucin layer, accompanied by butyrate-producing *Clostridium hiranonis*. However,  
281 additional, more detailed longitudinal studies on the impact of cranberry phytochemicals are  
282 needed to unravel the mechanisms by which bacteria influence inflammation-linked processes in  
283 intestinal tissues and how they manifest in long-term interventions.

284 In summary our study shows for the first time in a narrow longitudinal data set how a PAC-rich  
285 CJE induces community-wide shifts in the intestinal microbiome. Moreover, we are the first to  
286 demonstrate that termination of an intervention with a cranberry product induces changes of a  
287 magnitude at least as high as the intervention itself. Both intervals (treatment & post) highlight  
288 the strong resilience of the gut microbiome which was able to recover close to pre-treatment  
289 levels within two weeks. While the dominance of *B. ovatus* is mainly challenged by other  
290 *Bacteroides* species, *Clostridium ramosum* and *Escherichia coli* after the onset of the treatment,  
291 *Akkermansia muciniphila* and *Clostridium hiranonis* flourish after offset of the selection pressure  
292 imposed by the polyphenol-rich cranberry extract.

## 293 **Materials and Methods**

294

295 **Cranberry materials and reagents used in characterization.** A food-grade, water-soluble, sterile  
296 cranberry-juice derived powder in capsule form (CJE) was donated by Amy Howell of Rutgers  
297 University (Ellura<sup>®</sup>, Trophikos, Inc.). The powder is standardized by the manufacturer to contain  
298 at least 36 mg of proanthocyanidins per 240 mg capsule. The capsules were stored at -20°C and  
299 in the dark until use. Commercial reagents and standards for analysis were purchased from the  
300 following suppliers: Deuterated Dimethylsulfoxide (DMSO-d<sub>6</sub>, 99.9%) and 4,4-dimethyl-4-  
301 silapentane-1-sulfonic acid (Cambridge Isotope Laboratories, Andover, MA; N,N-  
302 dimethylaminocinnamaldehyde (DMAC), ursolic acid, oleanolic acid (Sigma-Aldrich, St. Louis,  
303 MO); malic acid (Eastman Chemicals, Kingsport, TN); citric acid (J.T Baker, Phillipsburg, NJ);  
304 quercetin-3-O-galactoside or hyperoside (Chromadex, Irvine, CA); procyanidin-A2 (Indofine Inc.,  
305 Hillsborough, NJ); quinic acid (Supelco, Bellefonte, PA); cyanidin-3-O-galactoside and peonidin-3-  
306 O-galactoside (Extrasynthese, Genay, France).

307

308 **Total proanthocyanidin determination.** The polyphenol content of the cranberry juice extract  
309 (CJE) was determined using established methods. Briefly, total proanthocyanidin (PAC) content  
310 was determined using a modification [46] of the industry standard microplate BL-DMAC assay  
311 [47]. An isolated whole fruit cranberry PAC fraction prepared as described previously [28] was  
312 used as the standard for the DMAC method, and absorbance measurements were obtained using  
313 a microplate reader (Molecular Devices SpectraMax M5, SoftMax Pro V5) as described in [36].

314

315 **Proanthocyanidin characterization.** PACs were isolated from the fraction for further  
316 characterization of oligomers by MALDI-TOF MS (Matrix-Assisted Laser Desorption-Ionization –  
317 Time-Of-Flight Mass Spectrometry) using methods established previously.[28] Briefly, free sugars  
318 were removed from CJE by chromatography on Diaion-HP20, washing with distilled water, then  
319 eluting the polyphenols and oligomers using methanol followed by acetone. The eluate was  
320 subjected to further chromatography on Sephadex-LH20, eluting with 70:30 methanol/water to  
321 remove any residual sugars, phenolic acids and flavonoids, followed by elution of  
322 proanthocyanidins using 70:30 acetone/water, rotary evaporation and lyophilization. MALDI-  
323 TOF MS analysis was performed by Dr. Stephen Eyles at the University of Massachusetts Amherst  
324 Mass Spectrometry Facility using a Bruker Daltonics Omnicflex MALDI-TOF mass spectrometer.  
325 Data acquisition was carried out in positive ion reflectron mode with 0.1 mM CsI, 0.1% TFA and  
326 50 mM dihydroxybenzoic acid included in the matrix.

327

328 **HPLC-DAD analysis.** CJE was analyzed for flavonoid composition using HPLC. Identification and  
329 quantitation of anthocyanins and flavonol glycosides was performed via reversed-phase HPLC-  
330 DAD using a Waters HPLC binary system with 515 pumps coupled with a Waters 996 photodiode

331 array detector and Waters Millenium32 software, as described previously.[36]. Briefly, analyses  
332 employed a Waters Atlantis C18 column (100 Å, 3 µm, 3.9 mm x 150 mm) and gradient elution at  
333 a flow rate of 0.9 mL/min with mobile phases consisting of 99.5:0.5 (v/v) water:phosphoric acid  
334 (A) and 50:48.5:1:0.5 (v/v/v/v) water:acetonitrile:acetic acid:phosphoric acid (B) according to a  
335 published gradient scheme as in [48] Flavonol glycosides were detected at a wavelength of 355  
336 nm and quantified based on a quercetin-3-O-glycoside standard; anthocyanins were detected at  
337 520 nm and quantified based on cyanidin-3-O-galactoside and peonidin-3-O-galactoside  
338 standards as previously described [6].

339  
340 **<sup>1</sup>H NMR analysis.** A qualitative profile of CJE was generated, and quantitative NMR to determine  
341 several non-polyphenol metabolites was conducted using a Bruker AVANCE III 400 MHz NMR  
342 spectrometer equipped with a 5mm BBFO z-gradient probe, as described previously [36]. Briefly,  
343 samples were prepared (n=5) at 75 mg/mL in DMSO-d<sub>6</sub> with 4,4-dimethyl-4-silapentane-1-  
344 sulfonic acid as a reference standard. <sup>1</sup>H NOESY NMR spectra were acquired and processed using  
345 TopSpinTM 3.5 and IconNMRTM 5.0.3 as in [36]. Data analysis was performed using  
346 AssureNMRTM 2.0 and AMIXTM 3.9.15. Organic acids and triterpenoids were determined by  
347 matching signals against a spectral database and quantified using peak fit integration.

348  
349 **Animal study.** To study the dynamics of the microbiota to a polyphenols-rich cranberry extract  
350 we adopted an approach similar to that presented in [49]. Briefly, six male germ-free C57BL/6  
351 mice at 8 weeks of age were transferred into individual cages and checked for sterility by plating  
352 before the start of the experiment. In order to closely monitor the complex microbial dynamics  
353 *in vivo* over several weeks, we chose a simplified human microbiome consisting of 25 predefined  
354 species. This allowed us to study the effect of CJE on human gut commensals in an *in vivo* gut  
355 environment, simplifying the knowledge transfer to a human study. On day 0 the mice were  
356 inoculated with GnotoComplex 2.0 flora by oral gavage [50]. After 14 days, time need to achieve  
357 stable bacterial establishment [49], mice were administered daily a dosage of 5 mg (200 mg/kg  
358 body weight) via oral gavage (0.250 mL of 20 mg/mL solution) of cranberry juice extract (CJE) for  
359 10 days until day 23 of the experiment. The daily dosage was chosen based on a previously  
360 published study in which a similar dosage appears to have been well-tolerated [51]. Fecal samples  
361 were collected every two days throughout the course of the experiment and daily around the  
362 beginning and and end of the CJE treatment. Fecal pellets were snapfrozen and stored at -80°C  
363 until DNA extraction with the DNeasy Powersoil kit by Qiagen (Hilden, Germany) according to the  
364 manufacturer's protocol. Variable region V3 and V4 of the bacterial *16S rRNA* gene were  
365 amplified using previously described methods using the universal 341F and 806R primers and  
366 sequenced with 300nt paired-end sequences on the Illumina MiSeq platform [52].

367

368 **Bioinformatics and computational analyses.** Forward and reverse 16S MiSeq-generated  
369 amplicon sequencing reads were dereplicated and sequences were inferred using dada2 [53].  
370 Potentially chimeric sequences were removed using consensus-based methods. Resulting  
371 amplicon sequencing variants (ASVs) were mapped to the *16S rRNA* gene sequence of the  
372 Gnotocomplex 2.0 strains and samples with less than 4000 reads were dropped from the analysis.  
373 Sequence files were imported into R and merged with a metadata file into a single Phyloseq  
374 object. Due to the repeated-sampling nature of the data (e.g., paired), to determine the effect  
375 CJE of each bacterial species abundance we first run linear mixed effect (LME) modeling and  
376 predicted the abundance of each bacterium (after applying a square root arcsine transformation)  
377 as a function of treatment period (pre/treatment/post) and by using mouse ID as random effect.  
378 For each contrast (pre vs. during, pre vs. post, and during vs. post) we used a Benjamini- Hochberg  
379 adjusted p-value of <0.05. In addition to running LME which “averages” abundance within a  
380 certain time-window we analyzed the abundance data using the change point detections  
381 algorithm to detect abrupt shifts in relative abundance of species across different time points  
382 (<http://sia.webpopix.org/changePoints.html>) [38, 39]. Detection of change point is based on the  
383 changes in means of relative abundance across time intervals. For a given number of segments  
384 (K), K-1 change points are detected using dynamic programming algorithm which minimizes the  
385 cost of segmentation along with reduced time complexity. To obtain an optimal number of  
386 segments ( $2 \leq K \leq K_{\max}$ ), an elbow curve is generated using cost of segmentation with respect to the  
387 number of segments. A knee point ( $K_{\text{opt}}$ ) with maximum curvature is estimated using the  
388 maximum of second derivative which is approximated using central difference.

389

390 **Acknowledgements/Funding Sources**

391 The authors wish to acknowledge Amy Howell of Rutgers University for providing the cranberry  
392 product, and the support of the Leo and Anne Albert Charitable Trust and the Commonwealth of  
393 Massachusetts, Department of Public Health (INTF4005HH2W20081179). Mass spectral data  
394 were obtained at the University of Massachusetts Mass Spectrometry Center and samples were  
395 sequenced at the Center for Microbiome Research (CMR) at the University of Massachusetts  
396 Medical School. Figure 2A was created with BioRender.com.

397

## 398 References

- 399 1. Weh KM, Clarke J, and Kresty LA (2016). Cranberries and Cancer: An Update of Preclinical Studies  
400 Evaluating the Cancer Inhibitory Potential of Cranberry and Cranberry Derived Constituents. **Antioxid**  
401 **Basel Switz.** 5(3). doi: 10.3390/antiox5030027.
- 402 2. Blumberg JB, Basu A, Krueger CG, Lila MA, Neto CC, Novotny JA, Reed JD, Rodriguez-Mateos A, and  
403 Toner CD (2016). Impact of Cranberries on Gut Microbiota and Cardiometabolic Health: Proceedings of  
404 the Cranberry Health Research Conference 2015. **Adv Nutr Int Rev J.** 7(4): 759S-770S. doi:  
405 10.3945/an.116.012583.
- 406 3. Colorectal Cancer Risk Factors. Am. Cancer Soc. Available at [https://www.cancer.org/cancer/colon-](https://www.cancer.org/cancer/colon-rectal-cancer/causes-risks-prevention/risk-factors.html)  
407 [rectal-cancer/causes-risks-prevention/risk-factors.html](https://www.cancer.org/cancer/colon-rectal-cancer/causes-risks-prevention/risk-factors.html) .
- 408 4. Bernstein CN, Blanchard JF, Kliewer E, and Wajda A (2001). Cancer risk in patients with inflammatory  
409 bowel disease: a population-based study. **Cancer.** 91(4): 854–862. doi: 10.1002/1097-  
410 0142(20010215)91:4<854::aid-cnrc1073>3.0.co;2-z.
- 411 5. Wu X, Song M, Cai X, Neto C, Tata A, Han Y, Wang Q, Tang Z, and Xiao H (2018). Chemopreventive  
412 effects of whole cranberry (*Vaccinium macrocarpon*) on colitis-associated colon tumorigenesis. **Mol Nutr**  
413 **Food Res.** 62(24): e1800942. doi: 10.1002/mnfr.201800942.
- 414 6. Wu X, Xue L, Tata A, Song M, Neto CC, and Xiao H (2020). Bioactive Components of Polyphenol-Rich  
415 and Non-Polyphenol-Rich Cranberry Fruit Extracts and Their Chemopreventive Effects on Colitis-  
416 Associated Colon Cancer. **J Agric Food Chem.** 68(25): 6845–6853. doi: 10.1021/acs.jafc.0c02604.
- 417 7. Neto CC, Upton, Roy, and Brendler, Thomas (2016). Anticancer Properties of Cranberry. In: Cranberry  
418 Fruit *Vaccinium Macrocarpon* Aiton - Stand. Anal. Qual. Control Ther. **American Herbal Pharmacopoeia**;  
419 pp 57–61.
- 420 8. Kondo M, MacKinnon SL, Craft CC, Matchett MD, Hurta RAR, and Neto CC (2011). Ursolic acid and its  
421 esters: occurrence in cranberries and other *Vaccinium* fruit and effects on matrix metalloproteinase  
422 activity in DU145 prostate tumor cells: Anti-tumor activity and content of ursolic acid from *Vaccinium*  
423 fruit. **J Sci Food Agric.** 91(5): 789–796. doi: 10.1002/jsfa.4330.
- 424 9. Déziel B, MacPhee J, Patel K, Catalli A, Kulka M, Neto C, Gottschall-Pass K, and Hurta R (2012).  
425 American cranberry (*Vaccinium macrocarpon*) extract affects human prostate cancer cell growth via cell  
426 cycle arrest by modulating expression of cell cycle regulators. **Food Funct.** 3(5): 556. doi:  
427 10.1039/c2fo10145a.
- 428 10. MacLean MA, Scott BE, Deziel BA, Nunnelley MC, Liberty AM, Gottschall-Pass KT, Neto CC, and Hurta  
429 RAR (2011). North American cranberry (*Vaccinium macrocarpon*) stimulates apoptotic pathways in  
430 DU145 human prostate cancer cells in vitro. **Nutr Cancer.** 63(1): 109–120. doi:  
431 10.1080/01635581.2010.516876.
- 432 11. Belkaid Y, and Hand TW (2014). Role of the Microbiota in Immunity and Inflammation. **Cell.** 157(1):  
433 121–141. doi: 10.1016/j.cell.2014.03.011.



- 434 12. Atarashi K, Tanoue T, Oshima K, Suda W, Nagano Y, Nishikawa H, Fukuda S, Saito T, Narushima S,  
435 Hase K, Kim S, Fritz JV, Wilmes P, Ueha S, Matsushima K, Ohno H, Olle B, Sakaguchi S, Taniguchi T,  
436 Morita H, Hattori M, and Honda K (2013). Treg induction by a rationally selected mixture of Clostridia  
437 strains from the human microbiota. **Nature**. 500(7461): 232–236. doi: 10.1038/nature12331.
- 438 13. Wipperfurth M, Bhattarai SK, Vorkas CK, Taur Y, Mathurin L, McAulay K, Vilbrun SC, Francois DJ,  
439 Bean J, Walsh KF, Nathan C, Fitzgerald DW, Glickman MS, and Bucci V (2020). Peripheral inflammatory  
440 response in human tuberculosis treatment is predicted by a combination of pathogen sterilization and  
441 microbiome dysbiosis. **medRxiv**. 2020.02.25.20027870. doi: 10.1101/2020.02.25.20027870.
- 442 14. Haran JP, Bhattarai SK, Foley SE, Dutta P, Ward DV, Bucci V, and McCormick BA (2019). Alzheimer’s  
443 Disease Microbiome Is Associated with Dysregulation of the Anti-Inflammatory P-Glycoprotein Pathway.  
444 **mBio**. 10(3). doi: 10.1128/mBio.00632-19.
- 445 15. Tanoue T, Morita S, Plichta DR, Skelly AN, Suda W, Sugiura Y, Narushima S, Vlamakis H, Motoo I,  
446 Sugita K, Shiota A, Takeshita K, Yasuma-Mitobe K, Riethmacher D, Kaisho T, Norman JM, Mucida D,  
447 Suematsu M, Yaguchi T, Bucci V, Inoue T, Kawakami Y, Olle B, Roberts B, Hattori M, Xavier RJ, Atarashi K,  
448 and Honda K (2019). A defined commensal consortium elicits CD8 T cells and anti-cancer immunity.  
449 **Nature**. 565(7741): 600–605. doi: 10.1038/s41586-019-0878-z.
- 450 16. Routy B et al. (2018). Gut microbiome influences efficacy of PD-1–based immunotherapy against  
451 epithelial tumors. **Science**. 359(6371): 91–97. doi: 10.1126/science.aan3706.
- 452 17. David LA, Maurice CF, Carmody RN, Gootenberg DB, Button JE, Wolfe BE, Ling AV, Devlin AS, Varma  
453 Y, Fischbach MA, Biddinger SB, Dutton RJ, and Turnbaugh PJ (2014). Diet rapidly and reproducibly alters  
454 the human gut microbiome. **Nature**. 505(7484): 559–563. doi: 10.1038/nature12820.
- 455 18. Oledzki B, Bucci V, Cawley C, McCormick B, Ward D, and Maldonado-Contreras A (2020). P073 DIET  
456 AS A MICROBIOME-CENTERED THERAPY FOR IBD. **Gastroenterology**. 158(3): S57–S58. doi:  
457 10.1053/j.gastro.2019.11.284.
- 458 19. Yang Q, Liang Q, Balakrishnan B, Belobrajdic DP, Feng Q-J, and Zhang W (2020). Role of Dietary  
459 Nutrients in the Modulation of Gut Microbiota: A Narrative Review. **Nutrients**. 12(2). doi:  
460 10.3390/nu12020381.
- 461 20. Sonnenburg JL, and Bäckhed F (2016). Diet–microbiota interactions as moderators of human  
462 metabolism. **Nature**. 535(7610): 56–64. doi: 10.1038/nature18846.
- 463 21. Anhe FF, Nachbar RT, Varin TV, Vilela V, Dudonné S, Pilon G, Fournier M, Lecours M-A, Desjardins Y,  
464 Roy D, Levy E, and Marette A (2017). A polyphenol-rich cranberry extract reverses insulin resistance and  
465 hepatic steatosis independently of body weight loss. **Mol Metab**. 6(12): 1563–1573. doi:  
466 10.1016/j.molmet.2017.10.003.
- 467 22. Straub TJ, Chou W-C, Manson AL, Schreiber HL, Walker BJ, Desjardins CA, Chapman SB, Kaspar KL,  
468 Kahsai OJ, Traylor E, Dodson KW, Hullar MAJ, Hultgren SJ, Khoo C, and Earl AM (2021). Limited effects of  
469 long-term daily cranberry consumption on the gut microbiome in a placebo-controlled study of women  
470 with recurrent urinary tract infections. **BMC Microbiol**. 21(1): 53. doi: 10.1186/s12866-021-02106-4.

- 471 23. Liu J, Hao W, He Z, Kwek E, Zhu H, Ma N, Ma KY, and Chen Z-Y (2021). Blueberry and cranberry  
472 anthocyanin extracts reduce bodyweight and modulate gut microbiota in C57BL/6 J mice fed with a  
473 high-fat diet. **Eur J Nutr**. doi: 10.1007/s00394-020-02446-3.
- 474 24. Nguyen T, Kimble L, Mathison B, and Chew B (2015). Whole Cranberry Powder Promotes  
475 *Bifidobacterium infantis* Attenuation of Disease Activity in Dextran Sulfate Sodium-Induced Colitis in  
476 Mice. **FASEB J**. 29(S1): 608.35. doi: [https://doi.org/10.1096/fasebj.29.1\\_supplement.608.35](https://doi.org/10.1096/fasebj.29.1_supplement.608.35).
- 477 25. FoodData Central. Available at [https://fdc.nal.usda.gov/fdc-app.html#/food-](https://fdc.nal.usda.gov/fdc-app.html#/food-details/1102706/nutrients)  
478 [details/1102706/nutrients](https://fdc.nal.usda.gov/fdc-app.html#/food-details/1102706/nutrients) [Accessed 02/20/2021].
- 479 26. Carpenter JL, Caruso FL, Tata A, Vorsa N, and Neto CC (2014). Variation in proanthocyanidin content  
480 and composition among commonly grown North American cranberry cultivars ( *Vaccinium macrocarpon*  
481 ): Proanthocyanidin content of cranberries. **J Sci Food Agric**. 94(13): 2738–2745. doi: 10.1002/jsfa.6618.
- 482 27. Reed JD, Krueger CG, and Vestling MM (2005). MALDI-TOF mass spectrometry of oligomeric food  
483 polyphenols. **Phytochemistry**. 66(18): 2248–2263. doi: 10.1016/j.phytochem.2005.05.015.
- 484 28. Patel KD, Scarano FJ, Kondo M, Hurta RAR, and Neto CC (2011). Proanthocyanidin-rich extracts from  
485 cranberry fruit (*Vaccinium macrocarpon* Ait.) selectively inhibit the growth of human pathogenic fungi  
486 *Candida* spp. and *Cryptococcus neoformans*. **J Agric Food Chem**. 59(24): 12864–12873. doi:  
487 10.1021/jf2035466.
- 488 29. Turbitt, John R. (2021). Analysis of Commercially Available Cranberry (*Vaccinium macrocarpon*)  
489 Supplements and Their Effect on Common Gut Microbes. Doctoral Dissertation, University of  
490 Massachusetts Dartmouth.
- 491 30. He X, and Liu RH (2006). Cranberry Phytochemicals: Isolation, Structure Elucidation, and Their  
492 Antiproliferative and Antioxidant Activities. **J Agric Food Chem**. 54(19): 7069–7074. doi:  
493 10.1021/jf061058l.
- 494 31. Sun J, Deering RW, Peng Z, Najia L, Khoo C, Cohen PS, Seeram NP, and Rowley DC (2019). Pectic  
495 Oligosaccharides from Cranberry Prevent Quiescence and Persistence in the Uropathogenic *Escherichia*  
496 *coli* CFT073. **Sci Rep**. 9(1): 19590. doi: 10.1038/s41598-019-56005-w.
- 497 32. Hotchkiss AT, Nuñez A, Strahan GD, Chau HK, White AK, Marais JPJ, Hom K, Vakkalanka MS, Di R,  
498 Yam KL, and Khoo C (2015). Cranberry Xyloglucan Structure and Inhibition of *Escherichia coli* Adhesion to  
499 Epithelial Cells. **J Agric Food Chem**. 63(23): 5622–5633. doi: 10.1021/acs.jafc.5b00730.
- 500 33. Neto CC, Penndorf KA, Feldman M, Meron-Sudai S, Zakay-Rones Z, Steinberg D, Fridman M, Kashman  
501 Y, Ginsburg I, Ofek I, and Weiss EI (2017). Characterization of non-dialyzable constituents from cranberry  
502 juice that inhibit adhesion, co-aggregation and biofilm formation by oral bacteria. **Food Funct**. 8(5):  
503 1955–1965. doi: 10.1039/C7FO00109F.
- 504 34. Anê FF, Roy D, Pilon G, Dudonné S, Matamoros S, Varin TV, Garofalo C, Moine Q, Desjardins Y, Levy  
505 E, and Marette A (2015). A polyphenol-rich cranberry extract protects from diet-induced obesity, insulin  
506 resistance and intestinal inflammation in association with increased *Akkermansia* spp. population in the  
507 gut microbiota of mice. **Gut**. 64(6): 872–883. doi: 10.1136/gutjnl-2014-307142.

- 508 35. Rodríguez-Morató J, Matthan NR, Liu J, de la Torre R, and Chen C-YO (2018). Cranberries attenuate  
509 animal-based diet-induced changes in microbiota composition and functionality: a randomized  
510 crossover controlled feeding trial. **J Nutr Biochem**. 62: 76–86. doi: 10.1016/j.jnutbio.2018.08.019.
- 511 36. Turbitt JR, Colson KL, Killday KB, Milstead A, and Neto CC (2020). Application of 1 H-NMR-based  
512 metabolomics to the analysis of cranberry (*Vaccinium macrocarpon*) supplements. **Phytochem Anal**  
513 **PCA**. 31(1): 68–80. doi: 10.1002/pca.2867.
- 514 37. USDA Database for the Proanthocyanidin Content of Selected Foods, Release 2 (2015). .
- 515 38. Killick R, and Eckley IA (2014). **changepoint** : An R Package for Changepoint Analysis. **J Stat Softw**.  
516 58(3). doi: 10.18637/jss.v058.i03.
- 517 39. Lavielle M (2005). Using penalized contrasts for the change-point problem. **Signal Process**. 85(8):  
518 1501–1510. doi: 10.1016/j.sigpro.2005.01.012.
- 519 40. Cai X, Han Y, Gu M, Song M, Wu X, Li Z, Li F, Goulette T, and Xiao H (2019). Dietary cranberry  
520 suppressed colonic inflammation and alleviated gut microbiota dysbiosis in dextran sodium sulfate-  
521 treated mice. **Food Funct**. 10(10): 6331–6341. doi: 10.1039/C9FO01537J.
- 522 41. Pierre JF, Heneghan AF, Feliciano RP, Shanmuganayagam D, Roenneburg DA, Krueger CG, Reed JD,  
523 and Kudsk KA (2013). Cranberry Proanthocyanidins Improve the Gut Mucous Layer Morphology and  
524 Function in Mice Receiving Elemental Enteral Nutrition. **J Parenter Enter Nutr**. 37(3): 401–409. doi:  
525 10.1177/0148607112463076.
- 526 42. Lordan C, Thapa D, Ross RP, and Cotter PD (2020). Potential for enriching next-generation health-  
527 promoting gut bacteria through prebiotics and other dietary components. **Gut Microbes**. 11(1): 1–20.  
528 doi: 10.1080/19490976.2019.1613124.
- 529 43. Lopetuso LR, Scaldaferrri F, Petito V, and Gasbarrini A (2013). Commensal Clostridia: leading players  
530 in the maintenance of gut homeostasis. **Gut Pathog**. 5(1): 23. doi: 10.1186/1757-4749-5-23.
- 531 44. Anhê FF, Pilon G, Roy D, Desjardins Y, Levy E, and Marette A (2016). Triggering *Akkermansia* with  
532 dietary polyphenols: A new weapon to combat the metabolic syndrome? **Gut Microbes**. 7(2): 146–153.  
533 doi: 10.1080/19490976.2016.1142036.
- 534 45. Ganesh BP, Klopfleisch R, Loh G, and Blaut M (2013). Commensal *Akkermansia muciniphila*  
535 Exacerbates Gut Inflammation in Salmonella Typhimurium-Infected Gnotobiotic Mice. **PLOS ONE**. 8(9):  
536 e74963. doi: 10.1371/journal.pone.0074963.
- 537 46. Feliciano RP, Shea MP, Shanmuganayagam D, Krueger CG, Howell AB, and Reed JD (2012).  
538 Comparison of isolated cranberry (*Vaccinium macrocarpon* Ait.) proanthocyanidins to catechin and  
539 procyanidins A2 and B2 for use as standards in the 4-(dimethylamino)cinnamaldehyde assay. **J Agric**  
540 **Food Chem**. 60(18): 4578–4585. doi: 10.1021/jf3007213.
- 541 47. Prior RL, Fan E, Ji H, Howell A, Nio C, Payne MJ, and Reed J (2010). Multi-laboratory validation of a  
542 standard method for quantifying proanthocyanidins in cranberry powders. **J Sci Food Agric**. 90(9): 1473–  
543 1478. doi: 10.1002/jsfa.3966.

- 544 48. Brown PN, and Shipley PR (2011). Determination of Anthocyanins in Cranberry Fruit and Cranberry  
545 Fruit Products by High-Performance Liquid Chromatography with Ultraviolet Detection: Single-  
546 Laboratory Validation. **J Aoac Int.** 94(2): 459–466. 21563679.
- 547 49. Bucci V, Tzen B, Li N, Simmons M, Tanoue T, Bogart E, Deng L, Yeliseyev V, Delaney ML, Liu Q, Olle B,  
548 Stein RR, Honda K, Bry L, and Gerber GK (2016). MDSINE: Microbial Dynamical Systems INference Engine  
549 for microbiome time-series analyses. **Genome Biol.** 17. doi: 10.1186/s13059-016-0980-6.
- 550 50. Riglar DT, Giessen TW, Baym M, Kerns SJ, Niederhuber MJ, Bronson RT, Kotula JW, Gerber GK, Way  
551 JC, and Silver PA (2017). Engineered bacteria can function in the mammalian gut long-term as live  
552 diagnostics of inflammation. **Nat Biotechnol.** 35(7): 653–658. doi: 10.1038/nbt.3879.
- 553 51. Singh DP, Singh S, Bijalwan V, Kumar V, Khare P, Baboota RK, Singh P, Boparai RK, Singh J, Kondepudi  
554 KK, Chopra K, and Bishnoi M (2018). Co-supplementation of isomalto-oligosaccharides potentiates  
555 metabolic health benefits of polyphenol-rich cranberry extract in high fat diet-fed mice via enhanced gut  
556 butyrate production. **Eur J Nutr.** 57(8): 2897–2911. doi: 10.1007/s00394-017-1561-5.
- 557 52. Kozich JJ, Westcott SL, Baxter NT, Highlander SK, and Schloss PD (2013). Development of a Dual-  
558 Index Sequencing Strategy and Curation Pipeline for Analyzing Amplicon Sequence Data on the MiSeq  
559 Illumina Sequencing Platform. **Appl Environ Microbiol.** 79(17): 5112–5120. doi: 10.1128/AEM.01043-13.
- 560 53. Callahan BJ, McMurdie PJ, Rosen MJ, Han AW, Johnson AJA, and Holmes SP (2016). DADA2: High-  
561 resolution sample inference from Illumina amplicon data. **Nat Methods.** 13(7): 581–583. doi:  
562 10.1038/nmeth.3869.
- 563
- 564

565 **Figures**

**A**

| Analyte                                                                               | mg/g extract |
|---------------------------------------------------------------------------------------|--------------|
| Polyphenols                                                                           |              |
| Proanthocyanidins (PACs)                                                              | 574 ± 42     |
| Anthocyanins                                                                          | 3.4 ± 0.3    |
| Flavonol glycosides                                                                   | 9.6 ± 0.5    |
| benzoic acid                                                                          | 17.6         |
| 6-O-benzoyl-D-glucose                                                                 | 31           |
| arabinoxylglucan oligosaccharides                                                     | UQ           |
| ursolic acid, oleanic acid, quinic acid, malic acid and citric acid were not detected |              |

**C**

| m/z      | Putative Structure                       |
|----------|------------------------------------------|
| 887.586  | (epi)catechin trimer, 1A type linkage    |
| 1175.871 | (epi)catechin tetramer, 1A type linkage  |
| 1463.957 | (epi)catechin pentamer, 1A type linkage  |
| 1752.13  | (epi)catechin hexamer, 1A type linkage   |
| 2038.29  | (epi)catechin heptamer, 2A type linkages |
| 2327.47  | (epi)catechin octamer, 1A type linkage   |

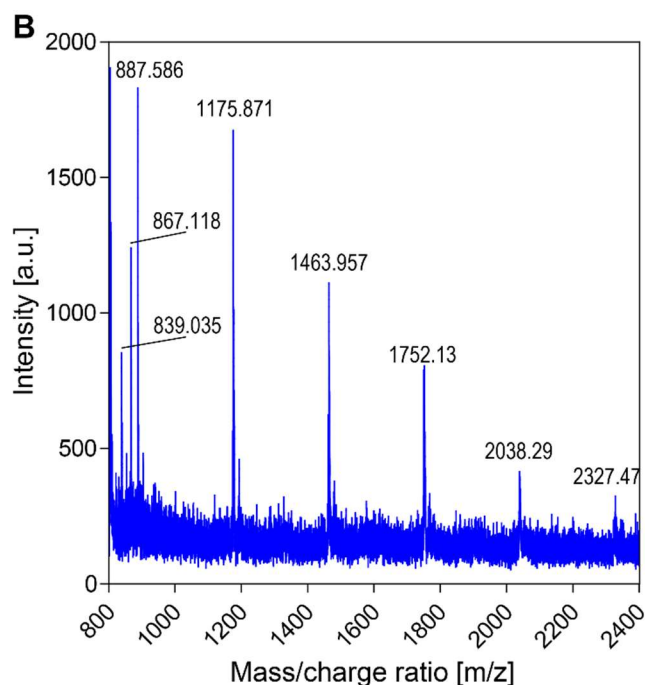

566

567 **Figure 1: Cranberry juice extract composition.** (A) Summary of cranberry juice extract components. UQ=Detected in  
 568 unknown quantity. (B) MALDI-TOF MS spectrum of proanthocyanidin (PAC) fraction from cranberry juice extract, in  
 569 positive ion mode. (C) Putative identification of the major ion masses in the PAC fraction.

570



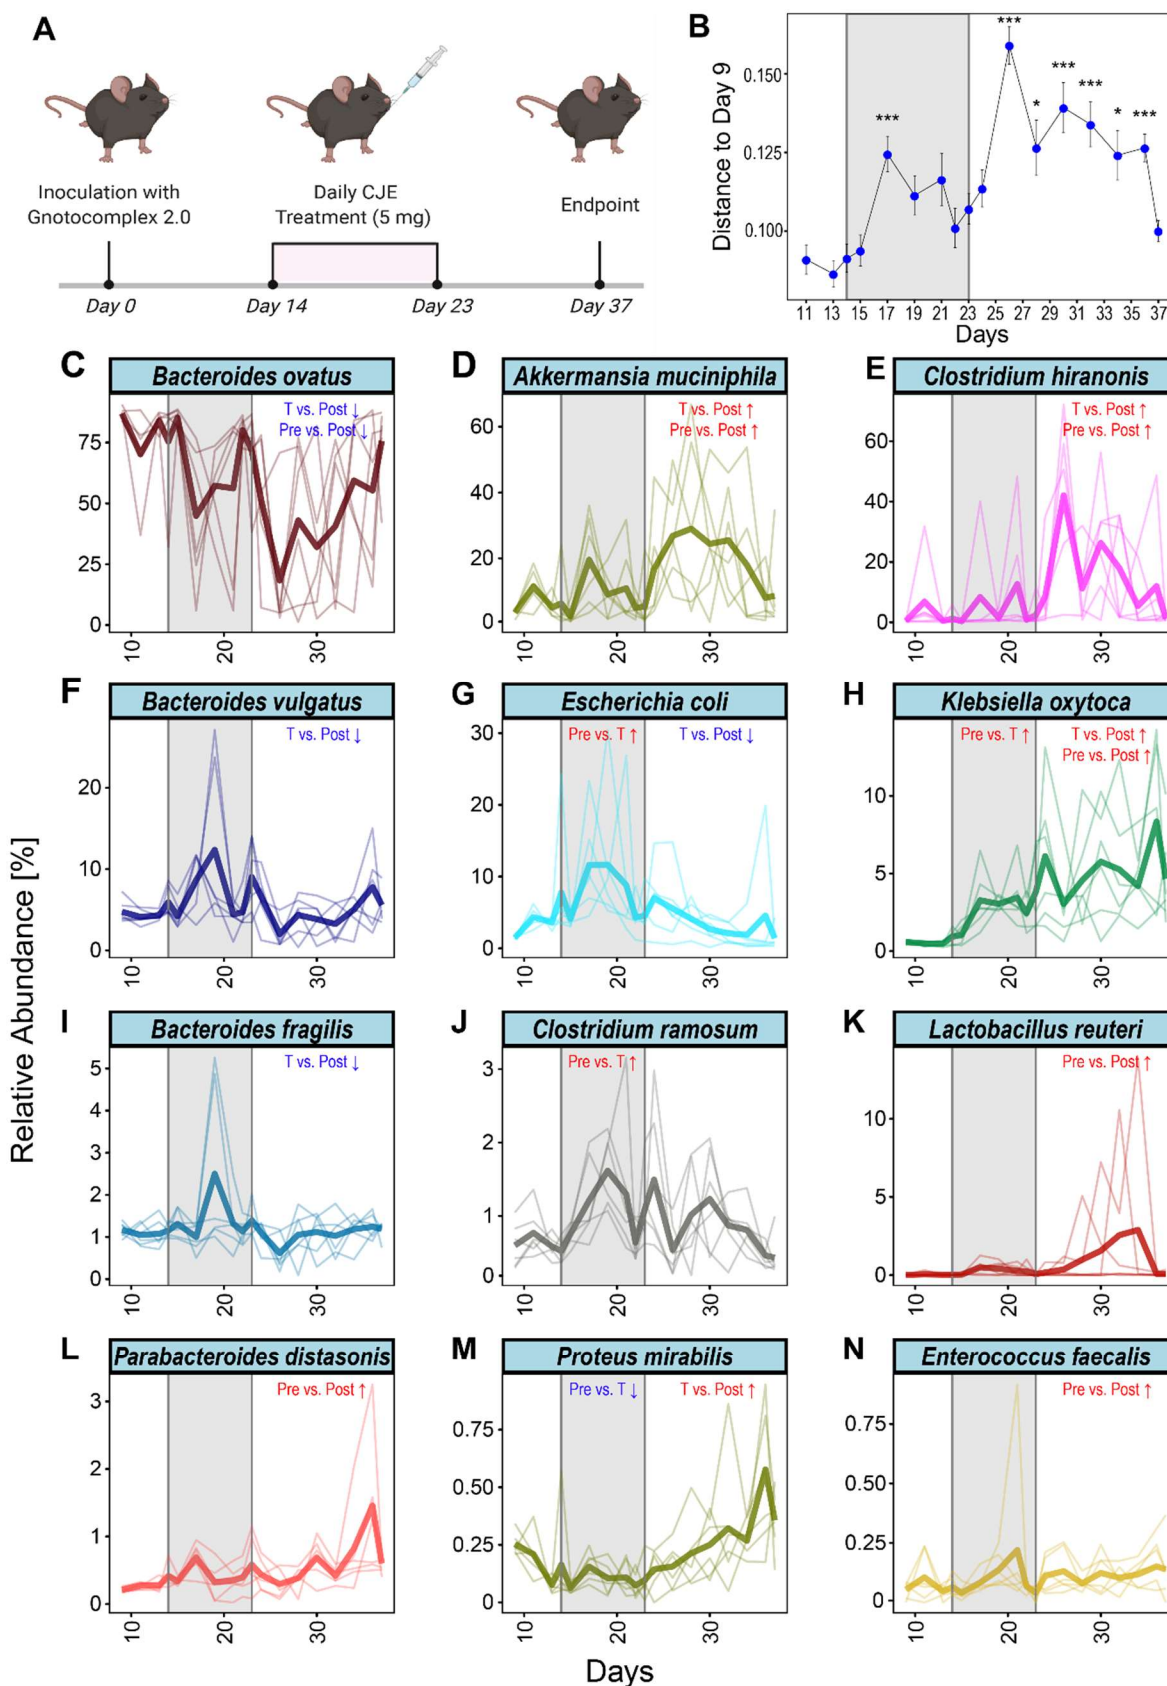

571

572

573

574

575

**Figure 2: CJE treatment modulates the intestinal microbiome in a gnotobiotic mouse model.** (A) Schematic of the experimental setup. (B) Bray-Curtis distance of the microbial compositions related to the pre-treatment time point day 9. Points and error bars represent mean and standard error of the mean. \*:  $p < 0.05$ , \*\*\*:  $p < 0.001$ . (C-N) Longitudinal depiction of the mean relative abundance throughout the experiment for the 12/15 bacteria that persistently colonized



576 the gnotobiotic mice and were regulated in response to the CJE treatment. Lighter lines show individual replicates. Data  
577 for indicated statistical tests are summarized in **Table 1**.

578

579

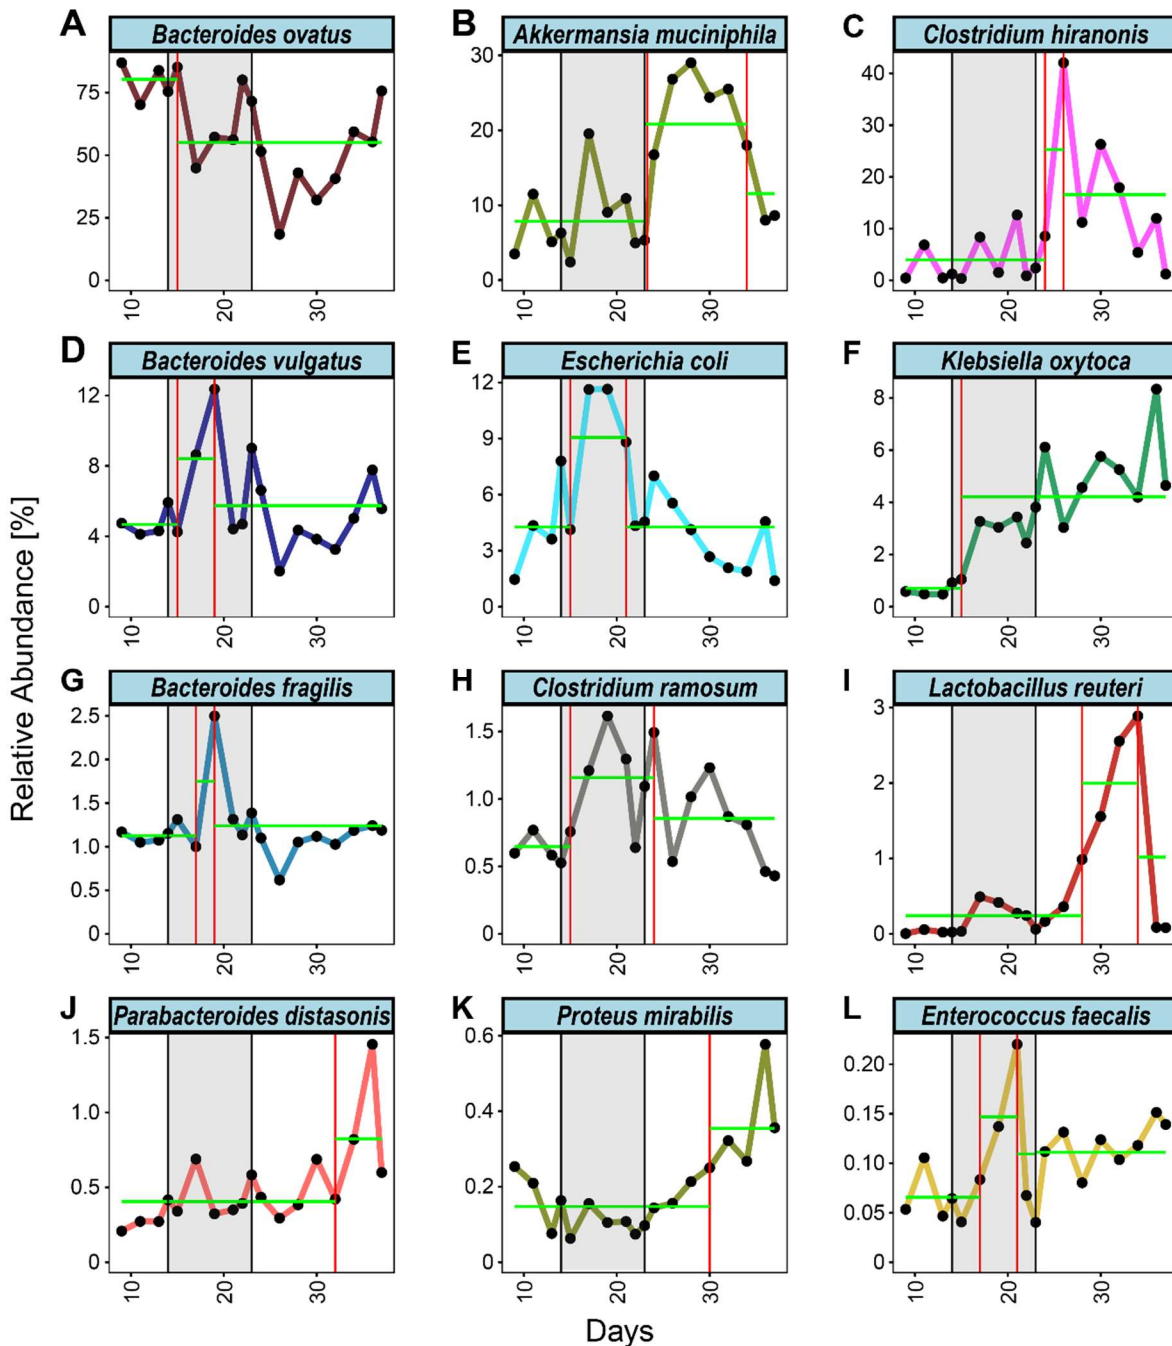

580

581 **Figure 3: Change point analysis of mean relative abundances throughout the experiment.** (A-L) Longitudinal depiction of  
582 the mean relative abundance throughout the experiment for the 12/15 bacteria that persistently colonized the gnotobiotic  
583 mice and were regulated in response to the CJE treatment. Change points are indicated with a red vertical line, segments  
584 are indicated with a green horizontal line. Figures for individual replicates are in the Supplementary Figures, a summary  
585 of changes and directions can be found in **Table 2**.

586

587

## Tables

588

Table 1: Results of linear mixed effect modeling for the 3 predefined experimental time intervals pre, treatment, post. SE=standard error.

| Bacterial species                          | Strain ID   | Pre vs. Treatment |       |         |              | Pre vs. Post |       |         |              | Treatment vs. Post |       |         |              |
|--------------------------------------------|-------------|-------------------|-------|---------|--------------|--------------|-------|---------|--------------|--------------------|-------|---------|--------------|
|                                            |             | Change            | SE    | p-value | adj. p-value | Change       | SE    | p-value | adj. p-value | Change             | SE    | p-value | adj. p-value |
| <i>Akkermansia muciniphila</i>             | DSM 22959   | -0.008            | 0.053 | 0.880   | 0.880        | -0.173       | 0.052 | 0.001   | 0.004        | -0.165             | 0.040 | 7.9E-05 | 4.5E-04      |
| <i>Bacteroides fragilis</i>                | ATCC 25285  | -0.011            | 0.007 | 0.133   | 0.206        | 0.004        | 0.007 | 0.554   | 0.674        | 0.015              | 0.005 | 0.007   | 0.018        |
| <i>Bacteroides ovatus</i>                  | ATCC 8483   | 0.151             | 0.085 | 0.078   | 0.135        | 0.392        | 0.084 | 9.4E-06 | 7.0E-05      | 0.241              | 0.064 | 3.1E-04 | 0.001        |
| <i>Bacteroides vulgatus</i>                | ATCC 8482   | -0.047            | 0.021 | 0.031   | 0.064        | 0.004        | 0.021 | 0.859   | 0.880        | 0.050              | 0.016 | 0.002   | 0.008        |
| <i>Bifidobacterium longum ssp infantis</i> | ATCC 15697  | 0.001             | 0.001 | 0.370   | 0.490        | 0.001        | 0.001 | 0.581   | 0.688        | 0.000              | 0.001 | 0.641   | 0.740        |
| <i>Clostridium hiranonis</i>               | DSM 13275   | -0.027            | 0.061 | 0.659   | 0.741        | -0.227       | 0.060 | 2.5E-04 | 0.001        | -0.201             | 0.046 | 3.1E-05 | 2.0E-04      |
| <i>Clostridium ramosum</i>                 | DSM 1402    | -0.018            | 0.008 | 0.018   | 0.046        | -0.009       | 0.008 | 0.246   | 0.335        | 0.010              | 0.006 | 0.103   | 0.169        |
| <i>Enterococcus faecalis</i>               | ATCC 29200  | -0.005            | 0.004 | 0.221   | 0.311        | -0.010       | 0.004 | 0.006   | 0.018        | -0.006             | 0.003 | 0.048   | 0.086        |
| <i>Escherichia coli</i>                    | MG1655      | -0.087            | 0.026 | 0.001   | 0.004        | 0.004        | 0.025 | 0.876   | 0.880        | 0.091              | 0.019 | 8.4E-06 | 7.0E-05      |
| <i>Klebsiella oxytoca</i>                  | ATCC 700324 | -0.081            | 0.016 | 1.6E-06 | 1.8E-05      | -0.146       | 0.016 | 4.6E-15 | 2.1E-13      | -0.065             | 0.012 | 5.9E-07 | 8.8E-06      |
| <i>Lactobacillus reuteri</i>               | DSM 20016   | -0.022            | 0.016 | 0.171   | 0.257        | -0.048       | 0.016 | 0.004   | 0.012        | -0.025             | 0.012 | 0.044   | 0.083        |
| <i>Parabacteroides distasonis</i>          | ATCC 8503   | -0.014            | 0.006 | 0.026   | 0.059        | -0.024       | 0.006 | 1.3E-04 | 0.001        | -0.010             | 0.005 | 0.030   | 0.064        |
| <i>Prevotella melaninogenica</i>           | ATCC 25845  | 0.003             | 0.002 | 0.105   | 0.169        | 0.001        | 0.002 | 0.541   | 0.674        | -0.002             | 0.001 | 0.177   | 0.257        |
| <i>Proteus mirabilis</i>                   | ATCC 29906  | 0.010             | 0.004 | 0.021   | 0.050        | -0.009       | 0.004 | 0.036   | 0.070        | -0.019             | 0.003 | 6.0E-08 | 1.3E-06      |
| <i>Veillonella parvula</i>                 | ATCC 10790  | 3.7E-04           | 0.002 | 0.815   | 0.873        | -4.5E-04     | 0.002 | 0.772   | 0.847        | -0.001             | 0.001 | 0.493   | 0.633        |

589

590 **Table 2: Results of changepoint analysis describing the dynamics for every bacterium in each mouse.** 'Response' indicates a change from the pre-treatment level  
 591 while a 'recovery' marks a subsequent change in the opposite direction. Arrow indicates the direction of the response relative to the pre-treatment level.

| Bacterial species                 | Strain ID   | Response/Recovery |          |           |          |         |          | Mean           |
|-----------------------------------|-------------|-------------------|----------|-----------|----------|---------|----------|----------------|
|                                   |             | Mouse I           | Mouse II | Mouse III | Mouse IV | Mouse V | Mouse VI |                |
| <i>Akkermansia muciniphila</i>    | DSM 22959   | 2/2 (↑)           | 1/1 (↑)  | 1/1 (↑)   | 1/0 (↑)  | 1/1 (↑) | 1/1 (↑)  | <b>1/1 (↑)</b> |
| <i>Bacteroides fragilis</i>       | ATCC 25285  | 1/1 (↑)           | 1/1 (↓)  | 1/1 (↑)   | 1/1 (↓)  | 1/0 (↑) | 1/1 (↑)  | <b>1/1 (↑)</b> |
| <i>Bacteroides ovatus</i>         | ATCC 8483   | 2/2 (↓)           | 1/1 (↓)  | 1/1 (↓)   | 1/0 (↓)  | 1/0 (↓) | 2/2 (↓)  | <b>1/0 (↓)</b> |
| <i>Bacteroides vulgatus</i>       | ATCC 8482   | 1/1 (↑)           | 1/1 (↑)  | 1/1 (↑)   | 1/1 (↑)  | 1/1 (↑) | 1/1 (↑)  | <b>1/1 (↑)</b> |
| <i>Clostridium hiranonis</i>      | DSM 13275   | 1/1 (↑)           | 1/1 (↑)  | 1/1 (↑)   | 1/1 (↑)  | 1/1 (↑) | 1/1 (↑)  | <b>1/1 (↑)</b> |
| <i>Clostridium ramosum</i>        | DSM 1402    | 1/1 (↑)           | 1/1 (↑)  | 1/1 (↑)   | 1/1 (↑)  | 1/1 (↑) | 1/1 (↑)  | <b>1/1 (↑)</b> |
| <i>Enterococcus faecalis</i>      | ATCC 29200  | 1/1 (↑)           | 1/0 (↑)  | 1/1 (↑)   | 1/0 (↑)  | 1/0 (↑) | 1/0 (↑)  | <b>1/1 (↑)</b> |
| <i>Escherichia coli</i>           | MG1655      | 1/1 (↑)           | 1/1 (↑)  | 1/1 (↑)   | 1/1 (↑)  | 1/1 (↑) | 1/0 (↓)  | <b>1/1 (↑)</b> |
| <i>Klebsiella oxytoca</i>         | ATCC 700324 | 1/0 (↑)           | 1/1 (↑)  | 1/0 (↑)   | 1/0 (↑)  | 1/1 (↑) | 1/0 (↑)  | <b>1/0 (↑)</b> |
| <i>Lactobacillus reuteri</i>      | DSM 20016   | 1/1 (↑)           | 1/1 (↑)  | 1/1 (↑)   | 1/1 (↑)  | 1/1 (↑) | 2/2 (↑)  | <b>1/1 (↑)</b> |
| <i>Parabacteroides distasonis</i> | ATCC 8503   | 1/1 (↑)           | 1/0 (↑)  | 1/0 (↑)   | 1/0 (↑)  | 1/0 (↑) | 1/0 (↑)  | <b>1/0 (↑)</b> |
| <i>Proteus mirabilis</i>          | ATCC 29906  | 1/0 (↑)           | 1/0 (↑)  | 1/0 (↑)   | 1/0 (↑)  | 2/2 (↑) | 1/0 (↑)  | <b>1/0 (↑)</b> |

592
